# Supplementary material for: A bis(imino)carbazolate pincer ligand stabilized mononuclear gallium(i) compound: synthesis, characterization, and reactivity
Source: Royal Society of Chemistry journal article supplement (doi:10.1039/d1dt02209a), 2021-01-01
Supplement: d1dt02209a1.pdf [file d1dt02209a1.pdf]

# A bis(imino)carbazolate pincer ligand stabilized mononuclear gallium(I) compound: Synthesis, characterization, and reactivity

Hao Li,<sup>†</sup> Yuhao He,<sup>†</sup> Chunmeng Liu,<sup>‡</sup> Gengwen Tan<sup>†\*</sup>

<sup>†</sup>College of Chemistry, Chemical Engineering and Materials Science, Soochow University, Suzhou 215123, China. E-mail: gwtan@suda.edu.cn.

<sup>‡</sup>Center for Molecular Imaging and Nuclear Medicine, School for Radiological and Interdisciplinary Sciences (RAD-X), Collaborative Innovation Center of Radiation Medicine of Jiangsu Higher Education Institutions, and State Key Laboratory of Radiation Medicine and Protection, Soochow University, Suzhou 215123, China

## Content

|                                                           |     |
|-----------------------------------------------------------|-----|
| Table S1. Crystal data and refinement of <b>2-6</b> ..... | S2  |
| Table S2. Crystal data and refinement of <b>6-8</b> ..... | S3  |
| Selected experimental spectra.....                        | S4  |
| Calculation details.....                                  | S10 |
| Coordinate of <b>3</b> .....                              | S11 |

**Table S1. Crystal data and refinement of 2-6**

|                                                   | <b>2</b>                                                          | <b>3</b>                                                                          | <b>4</b>                                                                        | <b>5</b>                                                          |
|---------------------------------------------------|-------------------------------------------------------------------|-----------------------------------------------------------------------------------|---------------------------------------------------------------------------------|-------------------------------------------------------------------|
| formula                                           | C <sub>46</sub> H <sub>58</sub> Cl <sub>2</sub> GaN <sub>3</sub>  | C <sub>46</sub> H <sub>58</sub> Ga <sub>0.6</sub> K <sub>0.4</sub> N <sub>3</sub> | C <sub>92</sub> H <sub>116</sub> Ga <sub>2</sub> N <sub>6</sub> Se <sub>2</sub> | C <sub>51</sub> H <sub>58</sub> CrGa <sub>3</sub> O <sub>5</sub>  |
| formula weight                                    | 793.57                                                            | 722.67                                                                            | 1603.26                                                                         | 914.72                                                            |
| crystal system                                    | Monoclinic                                                        | Monoclinic                                                                        | Monoclinic                                                                      | Triclinic                                                         |
| space group                                       | <i>P2(1)/c</i>                                                    | <i>P2(1)/n</i>                                                                    | <i>C2/c</i>                                                                     | <i>P-1</i>                                                        |
| <i>a</i> /Å                                       | 12.5642(10)                                                       | 12.4878(7)                                                                        | 46.899(2)                                                                       | 12.9201(3)                                                        |
| <i>b</i> /Å                                       | 14.3473(12)                                                       | 11.6830(6)                                                                        | 15.2306(8)                                                                      | 13.5764(4)                                                        |
| <i>c</i> /Å                                       | 23.322(2)                                                         | 28.9149(15)                                                                       | 33.5912(17)                                                                     | 14.9197(4)                                                        |
| <i>α</i> /deg                                     |                                                                   |                                                                                   |                                                                                 | 83.9920(10)                                                       |
| <i>β</i> /deg                                     | 100.111(2)                                                        | 99.338(2)                                                                         | 124.4080(10)                                                                    | 66.2460(10)                                                       |
| <i>γ</i> /deg                                     |                                                                   |                                                                                   |                                                                                 | 84.9710(10)                                                       |
| <i>V</i> /Å <sup>3</sup>                          | 4138.8(6)                                                         | 4162.6(4)                                                                         | 19796.0(17)                                                                     | 2379.20(11)                                                       |
| <i>Z</i>                                          | 4                                                                 | 4                                                                                 | 8                                                                               | 2                                                                 |
| $\rho_{\text{calcd}}/\text{g}\cdot\text{cm}^{-3}$ | 1.273                                                             | 1.153                                                                             | 1.076                                                                           | 1.277                                                             |
| $\mu/\text{mm}^{-1}$                              | 0.829                                                             | 0.481                                                                             | 1.320                                                                           | 0.843                                                             |
| <i>F</i> (000)                                    | 1680                                                              | 1525                                                                              | 6720                                                                            | 960                                                               |
| crystal size/mm <sup>3</sup>                      | 0.38 x 0.36 x<br>0.08                                             | 0.26 x 0.06 x 0.05                                                                | 0.26 x 0.22 x<br>0.20                                                           | 0.20 x 0.16 x<br>0.14                                             |
| $\theta$ range/deg                                | 1.774–24.999                                                      | 2.253–26.00                                                                       | 1.954–27.486                                                                    | 2.043–25.999                                                      |
| index ranges                                      | -14 ≤ <i>h</i> ≤ 14<br>-17 ≤ <i>k</i> ≤ 17<br>-27 ≤ <i>l</i> ≤ 27 | -15 ≤ <i>h</i> ≤ 15<br>-14 ≤ <i>k</i> ≤ 14<br>-35 ≤ <i>l</i> ≤ 35                 | -60 ≤ <i>h</i> ≤ 60<br>-19 ≤ <i>k</i> ≤ 19<br>-43 ≤ <i>l</i> ≤ 43               | -15 ≤ <i>h</i> ≤ 15<br>-16 ≤ <i>k</i> ≤ 16<br>-18 ≤ <i>l</i> ≤ 18 |
| collected data                                    | 66934                                                             | 39788                                                                             | 363906                                                                          | 69446                                                             |
| unique data                                       | 7271 ( <i>R</i> <sub>int</sub> =<br>0.1141)                       | 8177 ( <i>R</i> <sub>int</sub> =<br>0.0929)                                       | 22673 ( <i>R</i> <sub>int</sub> =<br>0.1128)                                    | 9334 ( <i>R</i> <sub>int</sub> =<br>0.0680)                       |
| completeness to $\theta$                          | 99.9%                                                             | 99.8%                                                                             | 99.9%                                                                           | 99.8%                                                             |
| GOF on <i>F</i> <sup>2</sup>                      | 1.022                                                             | 1.059                                                                             | 0.996                                                                           | 1.045                                                             |
| final <i>R</i> indices                            | <i>R</i> <sub>1</sub> = 0.0553                                    | <i>R</i> <sub>1</sub> = 0.0716                                                    | <i>R</i> <sub>1</sub> = 0.0458                                                  | <i>R</i> <sub>1</sub> = 0.0363                                    |
| [ <i>I</i> > 2σ( <i>I</i> )]                      | <i>wR</i> <sub>2</sub> = 0.1372                                   | <i>wR</i> <sub>2</sub> = 0.1701                                                   | <i>wR</i> <sub>2</sub> = 0.1144                                                 | <i>wR</i> <sub>2</sub> = 0.0909                                   |
| <i>R</i> indices (all data)                       | <i>R</i> <sub>1</sub> = 0.0800                                    | <i>R</i> <sub>1</sub> = 0.1179                                                    | <i>R</i> <sub>1</sub> = 0.0727                                                  | <i>R</i> <sub>1</sub> = 0.0454                                    |
|                                                   | <i>wR</i> <sub>2</sub> = 0.1574                                   | <i>wR</i> <sub>2</sub> = 0.1876                                                   | <i>wR</i> <sub>2</sub> = 0.1302                                                 | <i>wR</i> <sub>2</sub> = 0.0909                                   |
| Largest diff<br>peak/hole (e·Å <sup>-3</sup> )    | 1.471/-0.943                                                      | 0.918/-0.865                                                                      | 1.805/-0.953                                                                    | 0.563/-0.399                                                      |

**Table S2. Crystal data and refinement of 6-8**

|                                                   | <b>6</b>                                                          | <b>7</b>                                                          | <b>8</b>                                                                       |
|---------------------------------------------------|-------------------------------------------------------------------|-------------------------------------------------------------------|--------------------------------------------------------------------------------|
| formula                                           | C <sub>48</sub> H <sub>64</sub> AlN <sub>3</sub>                  | C <sub>53</sub> H <sub>66</sub> AlI <sub>2</sub> N <sub>3</sub>   | C <sub>92</sub> H <sub>116</sub> Al <sub>2</sub> I <sub>2</sub> N <sub>6</sub> |
| formula weight                                    | 710.00                                                            | 1025.86                                                           | 1613.66                                                                        |
| crystal system                                    | Monoclinic                                                        | Orthorhombic                                                      | Monoclinic                                                                     |
| space group                                       | <i>P2(1)/c</i>                                                    | <i>Fdd2</i>                                                       | <i>P2(1)/c</i>                                                                 |
| <i>a</i> /Å                                       | 12.4884(7)                                                        | 20.312(2)                                                         | 18.3541(17)                                                                    |
| <i>b</i> /Å                                       | 14.4969(7)                                                        | 48.543(4)                                                         | 21.0425(19)                                                                    |
| <i>c</i> /Å                                       | 23.4665(12)                                                       | 19.898(2)                                                         | 24.667(2)                                                                      |
| <i>α</i> /deg                                     |                                                                   |                                                                   |                                                                                |
| <i>β</i> /deg                                     | 99.594(2)                                                         |                                                                   | 108.628(4)                                                                     |
| <i>γ</i> /deg                                     |                                                                   |                                                                   |                                                                                |
| <i>V</i> /Å <sup>3</sup>                          | 4189.0(4)                                                         | 19620(3)                                                          | 9027.9(14)                                                                     |
| <i>Z</i>                                          | 4                                                                 | 16                                                                | 4                                                                              |
| $\rho_{\text{calcd}}/\text{g}\cdot\text{cm}^{-3}$ | 1.126                                                             | 1.389                                                             | 1.187                                                                          |
| $\mu/\text{mm}^{-1}$                              | 0.084                                                             | 1.337                                                             | 4.094                                                                          |
| <i>F</i> (000)                                    | 1544                                                              | 8384                                                              | 3368                                                                           |
| crystal size/mm <sup>3</sup>                      | 0.38 x 0.26 x 0.16                                                | 0.22 x 0.16 x 0.14                                                | 0.13 x 0.11 x 0.10                                                             |
| $\theta$ range/deg                                | 2.170–26.000                                                      | 2.212–25.998                                                      | 2.210–53.836                                                                   |
| index ranges                                      | -15 ≤ <i>h</i> ≤ 15<br>-17 ≤ <i>k</i> ≤ 17<br>-28 ≤ <i>l</i> ≤ 28 | -25 ≤ <i>h</i> ≤ 25<br>-57 ≤ <i>k</i> ≤ 57<br>-23 ≤ <i>l</i> ≤ 23 | -22 ≤ <i>h</i> ≤ 20<br>-25 ≤ <i>k</i> ≤ 22<br>-29 ≤ <i>l</i> ≤ 29              |
| collected data                                    | 42054                                                             | 111731                                                            | 67435                                                                          |
| unique data                                       | 8219 ( <i>R</i> <sub>int</sub> = 0.0878)                          | 8629 ( <i>R</i> <sub>int</sub> = 0.1594)                          | 16410 ( <i>R</i> <sub>int</sub> = 0.0560)                                      |
| completeness to $\theta$                          | 99.8%                                                             | 99.8%                                                             | 99.8%                                                                          |
| GOF on <i>F</i> <sup>2</sup>                      | 1.049                                                             | 1.039                                                             | 1.005                                                                          |
| final <i>R</i> indices                            | <i>R</i> <sub>1</sub> = 0.0543                                    | <i>R</i> <sub>1</sub> = 0.0450                                    | <i>R</i> <sub>1</sub> = 0.0373                                                 |
| [ <i>I</i> > 2σ( <i>I</i> )]                      | <i>wR</i> <sub>2</sub> = 0.1299                                   | <i>wR</i> <sub>2</sub> = 0.1041                                   | <i>wR</i> <sub>2</sub> = 0.0789                                                |
| <i>R</i> indices (all data)                       | <i>R</i> <sub>1</sub> = 0.0806                                    | <i>R</i> <sub>1</sub> = 0.0567                                    | <i>R</i> <sub>1</sub> = 0.0549                                                 |
|                                                   | <i>wR</i> <sub>2</sub> = 0.1422                                   | <i>wR</i> <sub>2</sub> = 0.1115                                   | <i>wR</i> <sub>2</sub> = 0.0866                                                |
| Largest diff peak/hole (e·Å <sup>-3</sup> )       | 0.356/-0.316                                                      | 0.797/-1.196                                                      | 0.620/-0.567                                                                   |

## Selected experimental spectra

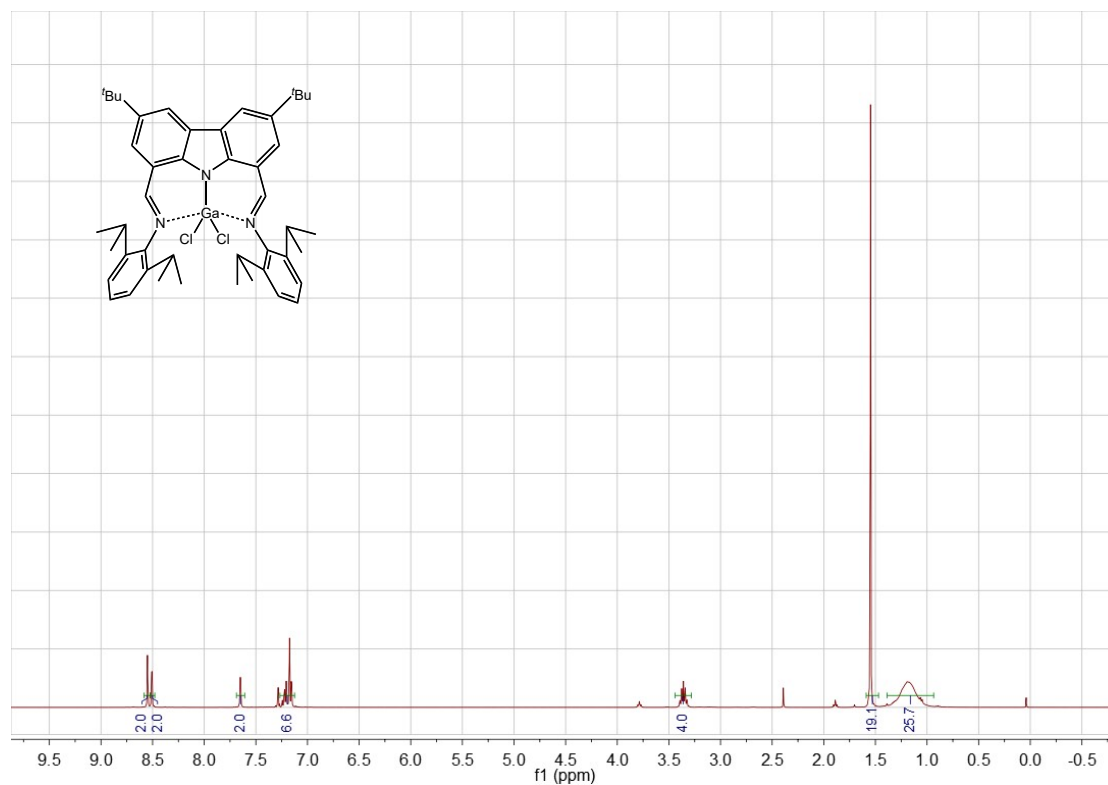

**Figure S1.** <sup>1</sup>H NMR (400 MHz, CDCl<sub>3</sub>) of **2** at room temperature.

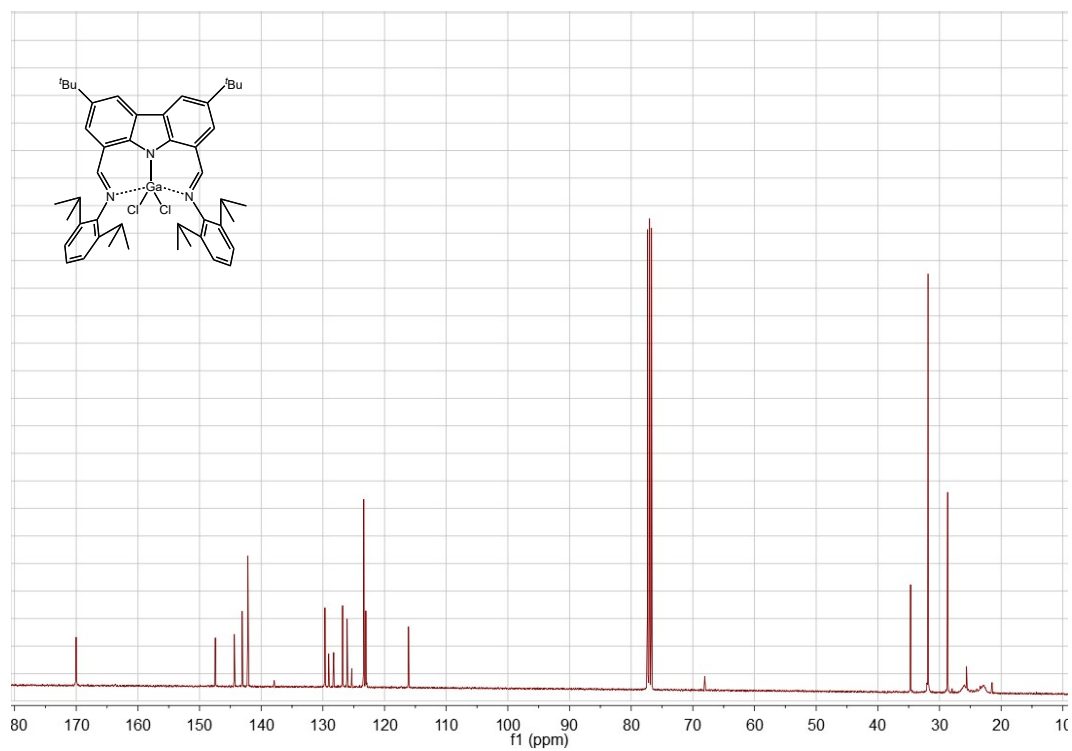

**Figure S2.** <sup>13</sup>C NMR (100 MHz, CDCl<sub>3</sub>) of **2** at room temperature.

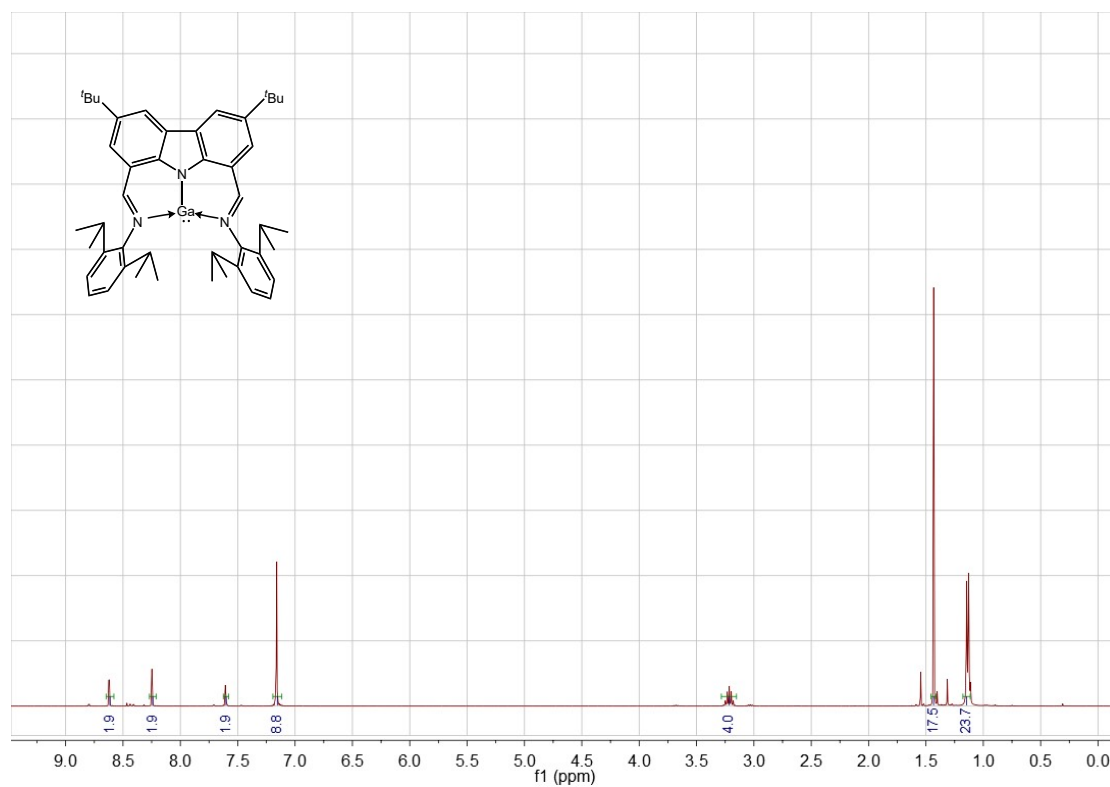

**Figure S3.**  $^1\text{H}$  NMR (400 MHz,  $\text{C}_6\text{D}_6$ ) of **3** at room temperature.

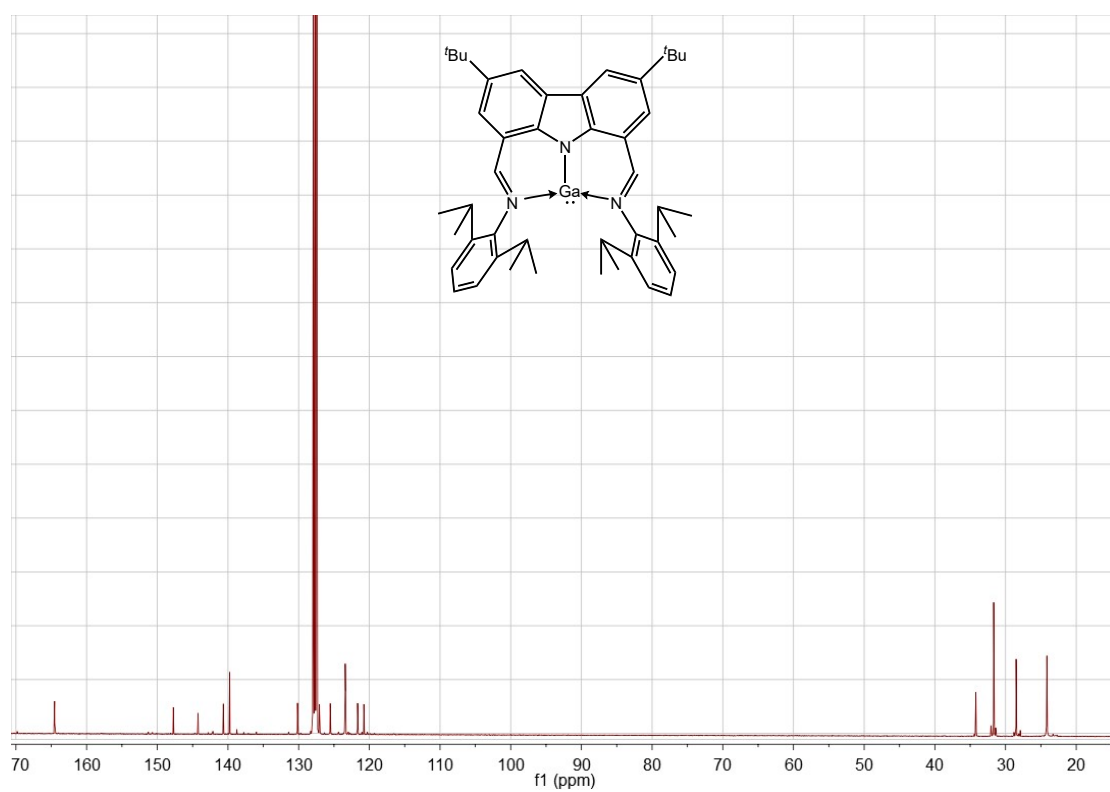

**Figure S4.**  $^{13}\text{C}$  NMR (100 MHz,  $\text{C}_6\text{D}_6$ ) of **3** at room temperature.

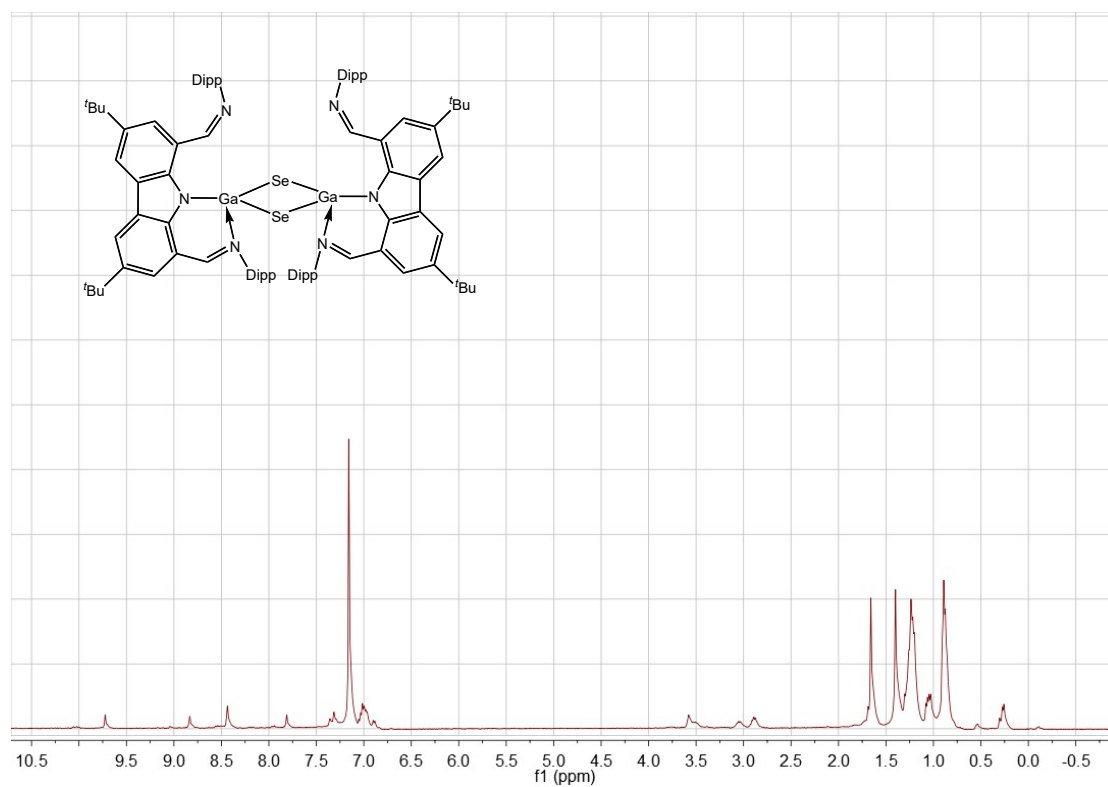

**Figure S5.** <sup>1</sup>H NMR (400 MHz, C<sub>6</sub>D<sub>6</sub>) of **4** at room temperature. Due to low solubility, very weak signals were observed.

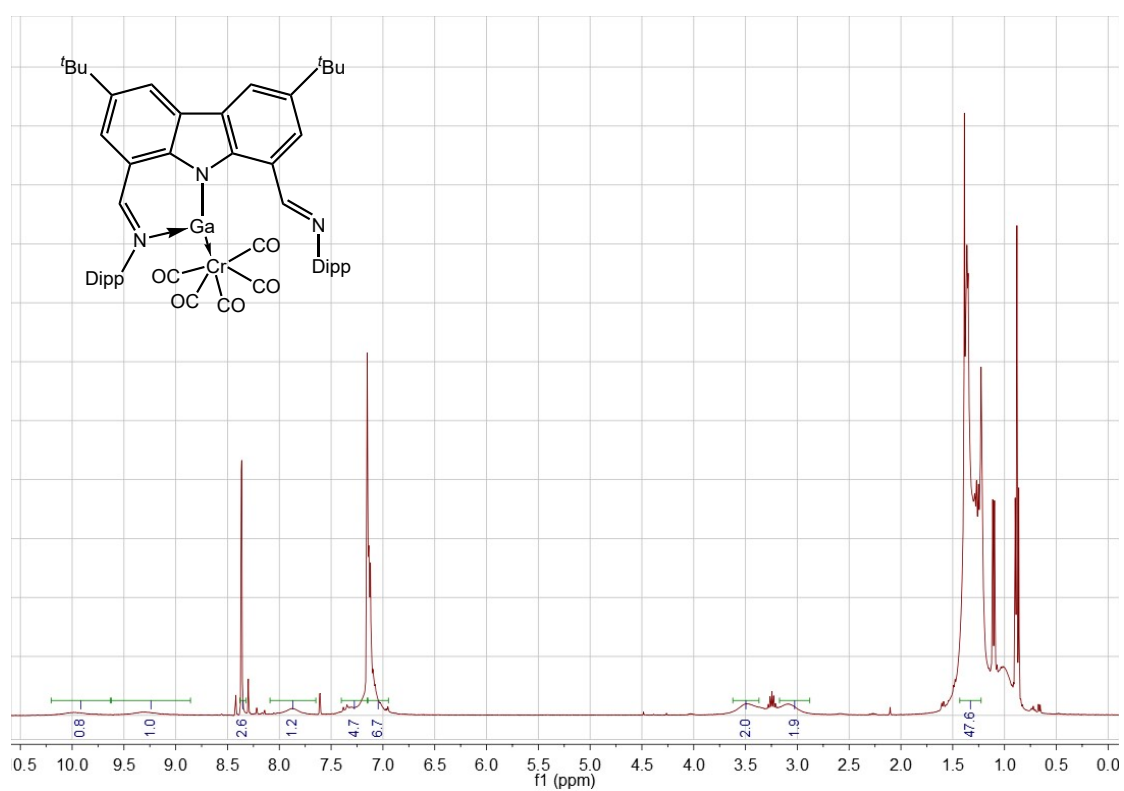

**Figure S6.** <sup>1</sup>H NMR (400 MHz, C<sub>6</sub>D<sub>6</sub>) of **5** at room temperature.

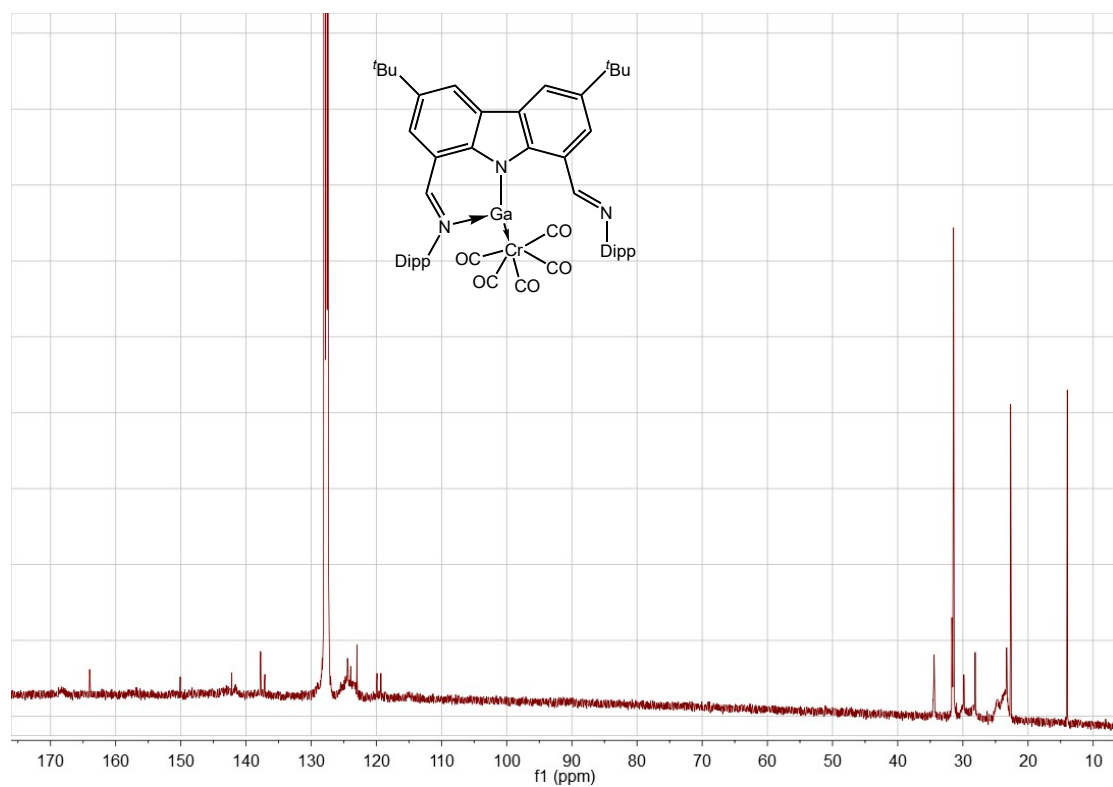

**Figure S7.**  $^{13}\text{C}$  NMR (400 MHz,  $\text{C}_6\text{D}_6$ ) of **5** at room temperature.

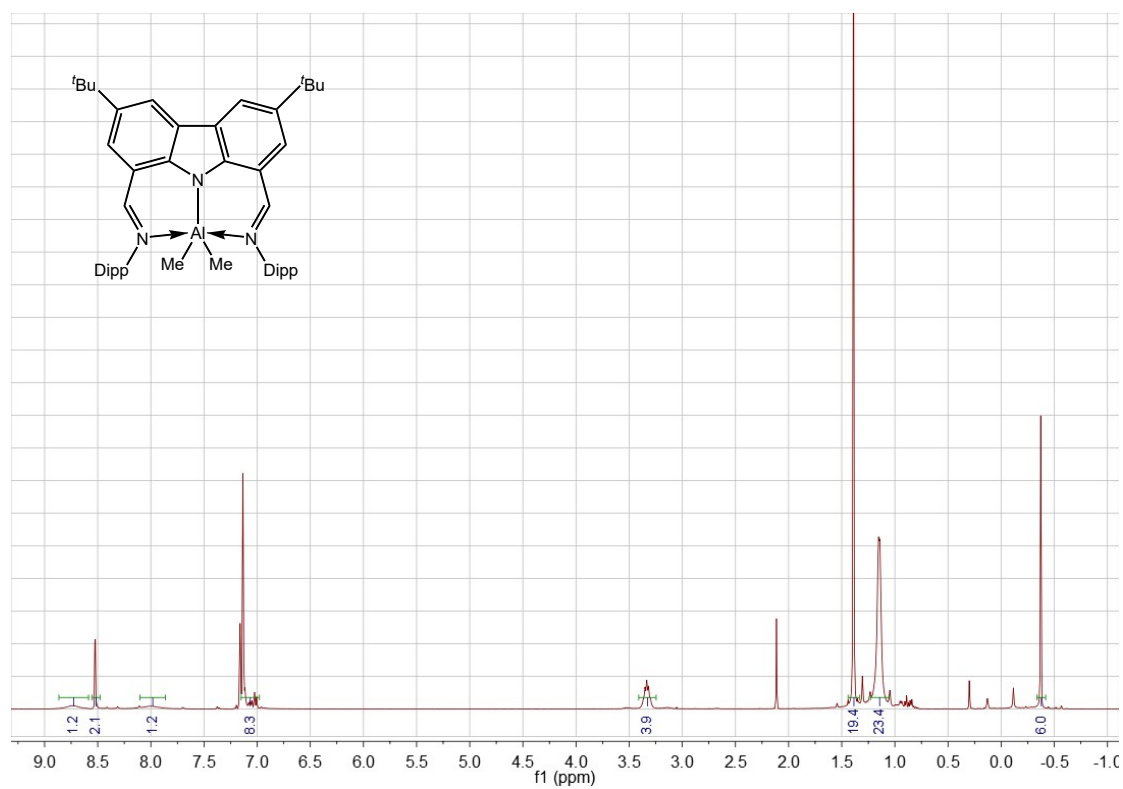

**Figure S8.**  $^1\text{H}$  NMR (400 MHz,  $\text{C}_6\text{D}_6$ ) of **6** at room temperature.

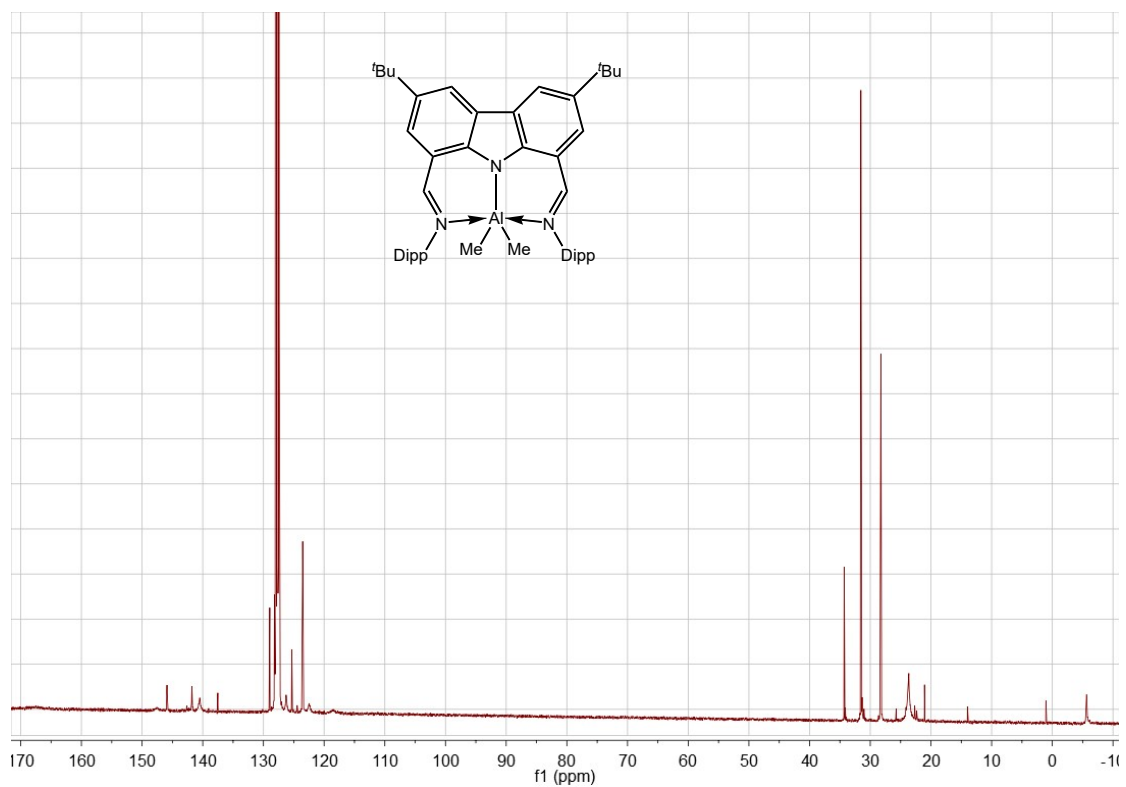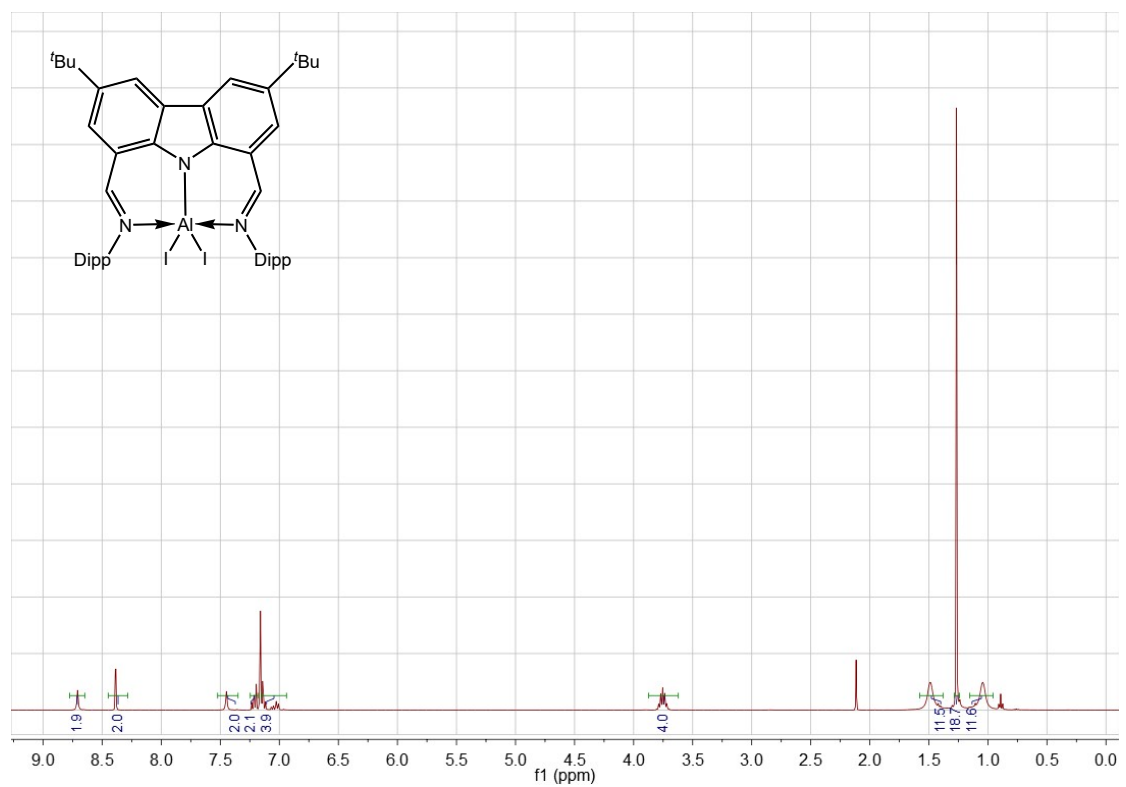



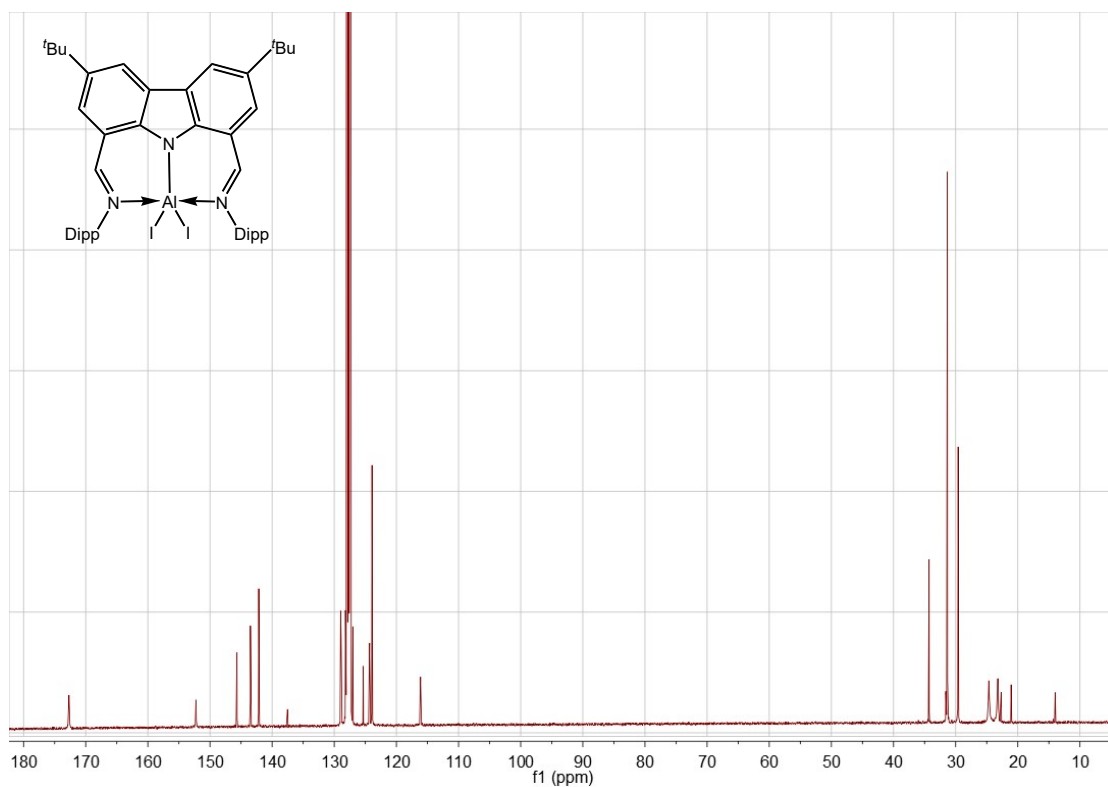

**Figure S11.**  $^{13}\text{C}$  NMR (100 MHz,  $\text{C}_6\text{D}_6$ ) of 7 at room temperature.

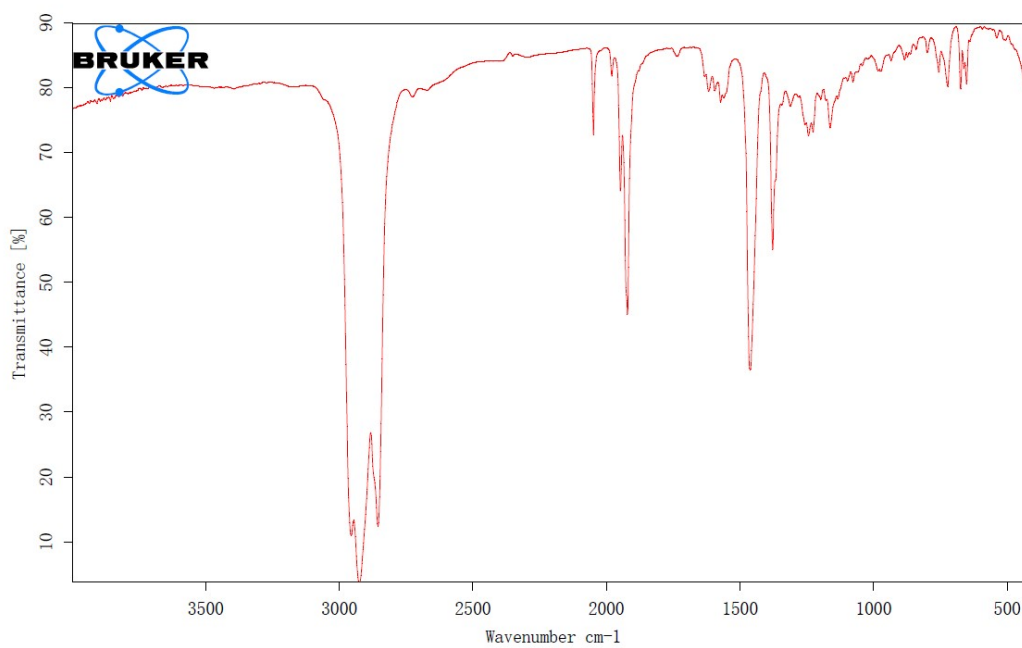

**Figure S12.** IR spectrum of 5.

## Calculation details

Geometry optimizations of the studied compound were performed with the density functional theory (DFT) method by using the B3LYP<sup>S1</sup> and 6-31G\* basis set<sup>S2</sup> at the Gaussian 16 program.<sup>S3</sup>

## References

- (S1) Ernzerhof, M.; Scuseria, G. E. Assessment of the Perdew-Burke-Ernzerhof exchange-correlation functional, *J. Chem. Phys.* **1999**, *110*, 5029-5036.
- (S2) Ditchfield, R.; Hehre, W. J.; and Pople, J. A. Self-Consistent Molecular Orbital Methods. 9. Extended Gaussian-type basis for molecular-orbital studies of organic molecules, *J. Chem. Phys.*, **1971**, *54*, 724.
- (S3) Frisch, M. J.; Trucks, G. W.; Schlegel, H. B.; Scuseria, G. E.; Robb, M. A.; Cheeseman, J. R.; Scalmani, G.; Barone, V.; Petersson, G. A.; Nakatsuji, H.; Li, X.; Caricato, M.; Marenich, A. V.; Bloino, J.; Janesko, B. G.; Gomperts, R.; Mennucci, B.; Hratchian, H. P.; Ortiz, J. V.; Izmaylov, A. F.; Sonnenberg, J. L.; Williams-Young, D.; Ding, F.; Lipparini, F.; Egidi, F.; Goings, J.; Peng, B.; Petrone, A.; Henderson, T.; Ranasinghe, D.; Zakrzewski, V. G.; Gao, J.; Rega, N.; Zheng, G.; Liang, W.; Hada, M.; Ehara, M.; Toyota, K.; Fukuda, R.; Hasegawa, J.; Ishida, M.; Nakajima, T.; Honda, Y.; Kitao, O.; Nakai, H.; Vreven, T.; Throssell, K.; Montgomery, J. A.; Jr., Peralta, J. E.; Ogliaro, F.; Bearpark, M. J.; Heyd, J. J.; Brothers, E. N.; Kudin, K. N.; Staroverov, V. N.; Keith, T. A.; Kobayashi, R.; Normand, J.; Raghavachari, K.; Rendell, A. P.; Burant, J. C.; Iyengar, S. S.; Tomasi, J.; Cossi, M.; Millam, J. M.; Klene, M.; Adamo, C.; Cammi, R.; Ochterski, J. W.; Martin, R. L.; Morokuma, K.; Farkas, O.; Foresman, J. B.; Fox, D. J. Gaussian, Inc., Wallingford CT, 2016, Revision B.01.

### Coordinate of 3

| Atomic<br>Number | Coordinates (Angstroms) |              |              |
|------------------|-------------------------|--------------|--------------|
|                  | X                       | Y            | Z            |
| 6                | -1.097712537            | 2.758317492  | -0.026347669 |
| 6                | -2.488016066            | 2.463328349  | 0.069384377  |
| 6                | -3.393924145            | 3.542948354  | 0.105920430  |
| 1                | -4.454394347            | 3.314984912  | 0.189165846  |
| 6                | -2.988325124            | 4.876629372  | 0.028295725  |
| 6                | -1.630758575            | 5.172461399  | -0.092316521 |
| 1                | -1.295702559            | 6.205288159  | -0.156375475 |
| 6                | -0.705705022            | 4.127695876  | -0.114881691 |
| 6                | 0.729273375             | 4.123978226  | -0.202260796 |
| 6                | 1.654992787             | 5.161128862  | -0.314447319 |
| 1                | 1.320035495             | 6.195359788  | -0.351372646 |
| 6                | 3.015942509             | 4.857626860  | -0.377106300 |
| 6                | 3.421974482             | 3.523791931  | -0.325892231 |
| 1                | 4.483209969             | 3.289241180  | -0.373445235 |
| 6                | 2.513515334             | 2.450929922  | -0.210565343 |
| 6                | 1.122350538             | 2.752267822  | -0.148540043 |
| 6                | -3.077691165            | 1.138180696  | 0.097629165  |
| 1                | -4.161242115            | 1.108775147  | 0.278933310  |
| 6                | 3.093918095             | 1.125667559  | -0.162632240 |
| 1                | 4.190841078             | 1.087781875  | -0.216322033 |
| 6                | -3.109048320            | -1.202109609 | -0.026297274 |
| 6                | -3.488905762            | -1.743177524 | 1.223515808  |
| 6                | -4.131149610            | -2.990088290 | 1.229234124  |
| 1                | -4.438679248            | -3.425098437 | 2.177096259  |
| 6                | -4.373964061            | -3.688117575 | 0.049625053  |
| 1                | -4.877402293            | -4.651286103 | 0.078831504  |
| 6                | -3.956420875            | -3.153144951 | -1.169977432 |
| 1                | -4.138608389            | -3.710679004 | -2.084262361 |
| 6                | -3.307361219            | -1.916160238 | -1.232358900 |
| 6                | -3.185695893            | -1.044800628 | 2.547702137  |
| 1                | -2.652611082            | -0.116253338 | 2.324093645  |
| 6                | -2.251079392            | -1.894656888 | 3.432451847  |
| 1                | -1.985478886            | -1.344237236 | 4.343917293  |
| 1                | -1.326373916            | -2.140577943 | 2.899492976  |
| 1                | -2.726555925            | -2.835070546 | 3.736680430  |
| 6                | -4.466970307            | -0.661982789 | 3.314591723  |
| 1                | -5.044624812            | -1.550213898 | 3.598879981  |
| 1                | -5.121211339            | -0.021846449 | 2.710859633  |

|    |              |              |              |
|----|--------------|--------------|--------------|
| 1  | -4.214509272 | -0.119562188 | 4.234282181  |
| 6  | -2.880968163 | -1.306569119 | -2.564341820 |
| 1  | -2.054022903 | -0.618958848 | -2.349253499 |
| 6  | -4.018568351 | -0.465331142 | -3.181975459 |
| 1  | -4.352662846 | 0.323196146  | -2.498455590 |
| 1  | -4.886195806 | -1.095881716 | -3.414683271 |
| 1  | -3.684841782 | 0.012177433  | -4.112021270 |
| 6  | -2.364998665 | -2.341146768 | -3.578810548 |
| 1  | -1.579525226 | -2.970554485 | -3.145860027 |
| 1  | -1.947792533 | -1.828826465 | -4.454190026 |
| 1  | -3.165195381 | -2.998092948 | -3.941060490 |
| 6  | 3.101894934  | -1.214220974 | 0.020108048  |
| 6  | 3.511706163  | -1.705021664 | 1.280122438  |
| 6  | 4.157826144  | -2.947718486 | 1.323057536  |
| 1  | 4.491422339  | -3.341521114 | 2.280097832  |
| 6  | 4.377360914  | -3.690706754 | 0.165248447  |
| 1  | 4.885421011  | -4.650290493 | 0.220155835  |
| 6  | 3.931814599  | -3.203981316 | -1.063295304 |
| 1  | 4.096288651  | -3.794939601 | -1.960231262 |
| 6  | 3.275693030  | -1.971166382 | -1.161394220 |
| 6  | 3.254108880  | -0.933205931 | 2.572038634  |
| 1  | 2.719091017  | -0.015848056 | 2.309440504  |
| 6  | 2.345738920  | -1.725018235 | 3.533679116  |
| 1  | 2.818711994  | -2.659492154 | 3.859455759  |
| 1  | 1.394751443  | -1.978122544 | 3.052631109  |
| 1  | 2.128689130  | -1.130060296 | 4.429876972  |
| 6  | 4.563306512  | -0.514756953 | 3.269694965  |
| 1  | 5.147919756  | -1.388663111 | 3.582881365  |
| 1  | 4.346796488  | 0.080779991  | 4.165342260  |
| 1  | 5.196688324  | 0.086464111  | 2.606543912  |
| 6  | 2.802032222  | -1.442971953 | -2.512723738 |
| 6  | 2.077940952  | -2.508736255 | -3.355634334 |
| 1  | 1.661917230  | -2.051528737 | -4.261752370 |
| 1  | 2.754684262  | -3.309446157 | -3.677440736 |
| 1  | 1.255029377  | -2.967155510 | -2.796075935 |
| 6  | 3.963861912  | -0.814329606 | -3.310241764 |
| 1  | 3.602040460  | -0.400424030 | -4.259946087 |
| 1  | 4.444823784  | -0.004662466 | -2.749078666 |
| 1  | 4.733269159  | -1.563196224 | -3.537349669 |
| 7  | 0.014901849  | 1.918469642  | -0.037663616 |
| 7  | -2.430834654 | 0.046588844  | -0.097333589 |
| 7  | 2.421512271  | 0.037106244  | -0.053167318 |
| 31 | 0.009772465  | -0.183496151 | 0.210257533  |
| 1  | 2.078207578  | -0.644827021 | -2.313232541 |

|   |              |             |              |
|---|--------------|-------------|--------------|
| 1 | 3.754618877  | 5.648931255 | -0.464777111 |
| 1 | -3.726763754 | 5.672568491 | 0.056144169  |

---
